# Supplementary material
Source: PubMed Central journal article supplement (PMC7470176)
Supplement: NIHMS1617542-supplement-Supplemental_Table_1.pdf [file NIHMS1617542-supplement-Supplemental_Table_1.pdf]

**Title:** Alcohol consumption and risk of melanoma among women: pooled analysis of eight case-control studies

**Journal name:** Archives of Dermatology Research

**Supplemental Table 1: Heterogeneity in adjusted pooled odds ratios (pOR) for melanoma in women in relation to consumption of alcohol and types of alcohol consumed<sup>a</sup>**

| <i>Alcohol Consumption</i>                                                                  | <b>Cases n (%)</b> | <b>Controls n (%)</b> | <b>pOR (95% CI)<sup>a</sup></b> |
|---------------------------------------------------------------------------------------------|--------------------|-----------------------|---------------------------------|
| <b>Bataille et al.</b>                                                                      |                    |                       |                                 |
| Never                                                                                       | 62 (24.3)          | 99 (39.1)             | 1.0 (Ref)                       |
| Ever                                                                                        | 193 (75.7)         | 154 (60.9)            | 2.5 (1.7–3.7)                   |
| <b>Smith et al.</b>                                                                         |                    |                       |                                 |
| Never                                                                                       | 86 (28)            | 76 (32.6)             | 1.0 (Ref)                       |
| Ever                                                                                        | 221 (72)           | 157 (67.4)            | 1.3 (0.9–1.9)                   |
| <b>Elwood et al.</b>                                                                        |                    |                       |                                 |
| Never                                                                                       | 54 (38.8)          | 60 (43.2)             | 1.0 (Ref)                       |
| Ever                                                                                        | 85 (61.2)          | 79 (56.8)             | 1.2 (0.7–2.0)                   |
| <b>Gallagher et al.</b>                                                                     |                    |                       |                                 |
| Never                                                                                       | 65 (18.8)          | 95 (26.9)             | 1.0 (Ref)                       |
| Ever                                                                                        | 281 (81.2)         | 258 (73.1)            | 1.6 (1.1–2.4)                   |
| <b>Green et al.</b>                                                                         |                    |                       |                                 |
| Never                                                                                       | 58 (63.7)          | 53 (59.6)             | 1.0 (Ref)                       |
| Ever                                                                                        | 33 (36.3)          | 36 (40.4)             | 0.9 (0.5–1.6)                   |
| <b>Kirkpatrick et al.</b>                                                                   |                    |                       |                                 |
| Never                                                                                       | 33 (26)            | 43 (29.7)             | 1.0 (Ref)                       |
| Ever                                                                                        | 94 (74)            | 102 (70.3)            | 1.0 (0.6–1.8)                   |
| <b>Langholz et al.</b>                                                                      |                    |                       |                                 |
| Never                                                                                       | 124 (36.4)         | 137 (37.5)            | 1.0 (Ref)                       |
| Ever                                                                                        | 217 (63.6)         | 228 (62.5)            | 1.1 (0.8–1.4)                   |
| <b>Osterlind et al.</b>                                                                     |                    |                       |                                 |
| Never                                                                                       | 53 (18.9)          | 90 (16.8)             | 1.0 (Ref)                       |
| Ever                                                                                        | 227 (81.1)         | 446 (83.2)            | 0.9 (0.6–1.3)                   |
| <b>All studies - pooled unequal variance<sup>b</sup></b>                                    |                    |                       |                                 |
| Never                                                                                       | 535 (28.4)         | 653 (30.9)            | 1.0 (Ref)                       |
| Ever                                                                                        | 1351 (71.6)        | 1460 (69.1)           | 1.3 (1.1–1.5)                   |
| p-value <sub>heterogeneity</sub> = 0.01                                                     |                    |                       |                                 |
| <b>Population based studies: pooled equal variance<sup>c</sup></b>                          |                    |                       |                                 |
| Never                                                                                       | 419 (28.1)         | 494 (28.7)            | 1.0 (Ref)                       |
| Ever                                                                                        | 1073 (71.9)        | 1227 (71.3)           | 1.1 (0.9–1.4)                   |
| <b>Population based studies: pooled unequal variance<sup>c</sup></b>                        |                    |                       |                                 |
| Never                                                                                       | 419 (28.1)         | 494 (28.7)            | 1.0 (Ref)                       |
| Ever                                                                                        | 1073 (71.9)        | 1227 (71.3)           | 1.1 (0.7–1.7)                   |
| p-value <sub>heterogeneity</sub> = 0.19                                                     |                    |                       |                                 |
| <b>Clinic based studies: pooled equal variance<sup>d</sup></b>                              |                    |                       |                                 |
| Never                                                                                       | 159 (40.6)         | 116 (29.4)            | 1.0 (Ref)                       |
| Ever                                                                                        | 233 (59.4)         | 278 (70.6)            | 1.8 (0.3–13.7)                  |
| <b>Clinic based studies: pooled unequal variance<sup>d</sup></b>                            |                    |                       |                                 |
| Never                                                                                       | 159 (40.6)         | 116 (29.4)            | 1.0 (Ref)                       |
| Ever                                                                                        | 233 (59.4)         | 278 (70.6)            | 1.8 (0.0–73.7)                  |
| p-value <sub>heterogeneity</sub> <0.01                                                      |                    |                       |                                 |
| <b>Exclude studies asking only current alcohol use: pooled equal variance<sup>e</sup></b>   |                    |                       |                                 |
| Never                                                                                       | 449 (30.4)         | 520 (36.3)            | 1.0 (Ref)                       |
| Ever                                                                                        | 1030 (69.6)        | 912 (63.7)            | 1.4 (1.1–1.7)                   |
| <b>Exclude studies asking only current alcohol use: pooled unequal variance<sup>e</sup></b> |                    |                       |                                 |
| Never                                                                                       | 449 (30.4)         | 520 (36.3)            | 1.0 (Ref)                       |
| Ever                                                                                        | 1030 (69.6)        | 912 (63.7)            | 1.4 (0.9–2.1)                   |
| p-value <sub>heterogeneity</sub> <0.01                                                      |                    |                       |                                 |

CI: confidence intervals.

Kyoko Miura, Michael S Zens, Tessa Peart; Elizabeth A Holly, Marianne Berwick, Richard P Gallagher, Thomas M Mack, Mark J Elwood, Margaret R Karagas, Adèle C Green on behalf of the International Melanoma Analysis Group (IMAGE) authors.

**Corresponding author:** Kyoko Miura: QIMR Berghofer Medical Research Institute.

e-mail: Kyoko.Miura@qimrberghofer.edu.au

**Title:** Alcohol consumption and risk of melanoma among women: pooled analysis of eight case-control studies

**Journal name:** Archives of Dermatology Research

<sup>a</sup>Adjusted for age.

<sup>b</sup>Eight studies included in the analyses.

<sup>c</sup>Six population based studies were included.

<sup>d</sup>Two clinic based studies were included Elwood et al. and Bataille et al.

<sup>e</sup>Six studies asked about ever use alcohol directly; two studies Kirkpatrick et al. and Osterlind et al. calculated overall alcohol use from current alcohol use.

Kyoko Miura, Michael S Zens, Tessa Peart; Elizabeth A Holly, Marianne Berwick, Richard P Gallagher, Thomas M Mack, Mark J Elwood, Margaret R Karagas, Adèle C Green on behalf of the International Melanoma Analysis Group (IMAGE) authors.

**Corresponding author:** Kyoko Miura: QIMR Berghofer Medical Research Institute.  
e-mail: Kyoko.Miura@qimrberghofer.edu.au
