# Supplementary material
Source: PubMed Central journal article supplement (PMC7470176)
Supplement: NIHMS1617542-supplement-Supplemental_Table_2.pdf [file NIHMS1617542-supplement-Supplemental_Table_2.pdf]

**Title:** Alcohol consumption and risk of melanoma among women: pooled analysis of eight case-control studies

**Journal name:** Archives of Dermatology Research

**Supplemental Table 2: Adjusted pooled odds ratios (pOR) for melanoma in women in relation to alcohol consumption by age group<sup>a</sup>**

| Exposure Measure                                      | < 50 years old |                |               | ≥ 50 years old |                |               |
|-------------------------------------------------------|----------------|----------------|---------------|----------------|----------------|---------------|
|                                                       | Cases n (%)    | Controls n (%) | pOR (95% CI)  | Cases n (%)    | Controls n (%) | pOR (95% CI)  |
| <i>Total alcohol consumption<sup>b</sup></i>          |                |                |               |                |                |               |
| Never                                                 | 232 (23.3)     | 295 (26.0)     | 1.0 (Ref)     | 303 (34.0)     | 358 (36.6)     | 1.0 (Ref)     |
| Ever                                                  | 762 (76.7)     | 841 (74.0)     | 1.3 (1.0–1.7) | 589 (66.0)     | 619 (63.4)     | 1.2 (1.0–1.6) |
| <i>Amount of alcohol consumed (g/day)<sup>c</sup></i> |                |                |               |                |                |               |
| None                                                  | 114 (21.0)     | 153 (22.0)     | 1.0 (Ref)     | 211 (33.0)     | 280 (36.1)     | 1.0 (Ref)     |
| Q1: 0.5–<1.4                                          | 79 (14.6)      | 105 (15.1)     | 1.1 (0.5–2.6) | 121 (18.9)     | 141 (18.2)     | 1.3 (0.8–2.0) |
| Q2: 1.4–<3.5                                          | 132 (24.4)     | 148 (21.3)     | 1.3 (0.6–2.9) | 126 (19.7)     | 121 (15.6)     | 1.4 (0.9–2.2) |
| Q3: 3.5–<6.7                                          | 96 (17.7)      | 129 (18.6)     | 1.2 (0.5–2.9) | 95 (14.8)      | 103 (13.3)     | 1.3 (0.8–2.2) |
| Q4: 6.7–44.4                                          | 121 (22.3)     | 159 (22.9)     | 1.2 (0.5–2.7) | 87 (13.6)      | 131 (16.9)     | 0.9 (0.6–1.5) |

CI: confidence intervals; Q1: lowest fourth, Q2: second lowest fourth, Q3: second highest fourth, Q4: highest fourth.

<sup>a</sup> Adjusted for age.

<sup>b</sup> Eight studies included in the analyses.

<sup>c</sup> Five studies included in the analyses.

Kyoko Miura, Michael S Zens, Tessa Peart; Elizabeth A Holly, Marianne Berwick, Richard P Gallagher, Thomas M Mack, Mark J Elwood, Margaret R Karagas, Adèle C Green on behalf of the International Melanoma Analysis Group (IMAGE) authors.

**Corresponding author:** Kyoko Miura: QIMR Berghofer Medical Research Institute.  
e-mail: Kyoko.Miura@qimrberghofer.edu.au
