# Supplementary material
Source: PubMed Central journal article supplement (PMC7470176)
Supplement: NIHMS1617542-supplement-Supplemental_Table_3.pdf [file NIHMS1617542-supplement-Supplemental_Table_3.pdf]

**Title:** Alcohol consumption and risk of melanoma among women: pooled analysis of eight case-control studies

**Journal name:** Archives of Dermatology Research

**Supplemental Table 3: Adjusted pooled odds ratios (pOR) for melanoma in women in relation to alcohol consumption by histologic subtypes<sup>a</sup>**

| Exposure Measure                             | SSM         |                |               | LMM         |                |               | NM          |                |               | OM          |                |               |
|----------------------------------------------|-------------|----------------|---------------|-------------|----------------|---------------|-------------|----------------|---------------|-------------|----------------|---------------|
|                                              | Cases n (%) | Controls n (%) | pOR (95% CI)  | Cases n (%) | Controls n (%) | pOR (95% CI)  | Cases n (%) | Controls n (%) | pOR (95% CI)  | Cases n (%) | Controls n (%) | pOR (95% CI)  |
| <i>Total alcohol consumption<sup>b</sup></i> |             |                |               |             |                |               |             |                |               |             |                |               |
| Never                                        | 388 (29.0)  | 653 (30.9)     | 1.0 (Ref)     | 18 (30.0)   | 312 (36.7)     | 1.0 (Ref)     | 76 (30.3)   | 610 (31.0)     | 1.0 (Ref)     | 447 (29.0)  | 554 (29.8)     | 1.0 (Ref)     |
| Ever                                         | 952 (71.0)  | 1460 (69.1)    | 1.2 (1.0–1.5) | 42 (70)     | 539 (63.3)     | 1.5 (0.4–5.7) | 175 (69.7)  | 1358 (69.0)    | 1.1 (0.8–1.6) | 1095 (71.0) | 1306 (70.2)    | 1.1 (0.9–1.4) |
| <i>Amount of alcohol (g/day)<sup>c</sup></i> |             |                |               |             |                |               |             |                |               |             |                |               |
| None                                         | 214 (26.7)  | 402 (28.0)     | 1.0 (Ref)     |             |                |               | 50 (29.1)   | 348 (27.2)     | 1.0 (Ref)     | 294 (26.9)  | 402 (28.0)     | 1.0 (Ref)     |
| Q1: 0.5–<1.4                                 | 127 (15.9)  | 248 (17.3)     | 1.0 (0.6–1.6) |             |                | d             | 26 (15.1)   | 209 (16.3)     | 0.9 (0.3–3.0) | 179 (16.4)  | 248 (17.3)     | 1.0 (0.7–1.6) |
| Q2: 1.4–<3.5                                 | 170 (21.2)  | 263 (18.3)     | 1.2 (0.8–1.9) |             |                | d             | 44 (25.6)   | 242 (18.9)     | 1.2 (0.4–3.3) | 235 (21.5)  | 263 (18.3)     | 1.2 (0.8–1.9) |
| Q3: 3.5–<6.7                                 | 130 (16.2)  | 227 (15.8)     | 1.2 (0.7–2.0) |             |                | d             | 27 (15.7)   | 214 (16.7)     | 1.2 (0.3–4.6) | 179 (16.4)  | 227 (15.8)     | 1.2 (0.8–1.9) |
| Q4: 6.7–44.7                                 | 160 (20.0)  | 296 (20.6)     | 1.0 (0.7–1.6) |             |                | d             | 25 (14.5)   | 267 (20.9)     | 0.6 (0.2–2.1) | 207 (18.9)  | 296 (20.6)     | 1.0 (0.6–1.5) |

CI: confidence intervals; SSM: superficial spreading melanoma; LMM: lentigo maligna melanoma; NM: nodular melanoma; OM: other melanoma; Q1: lowest fourth, Q2: second lowest fourth, Q3: second highest fourth, Q4: highest fourth.

<sup>a</sup>Adjusted for age.

<sup>b</sup>Eight studies included in the analyses.

<sup>c</sup>Four studies included in the analyses.

<sup>d</sup>Too sparse to calculate.

Kyoko Miura, Michael S Zens, Tessa Peart; Elizabeth A Holly, Marianne Berwick, Richard P Gallagher, Thomas M Mack, Mark J Elwood, Margaret R Karagas, Adèle C Green on behalf of the International Melanoma Analysis Group (IMAGE) authors.

**Corresponding author:** Kyoko Miura: QIMR Berghofer Medical Research Institute.

e-mail: Kyoko.Miura@qimrberghofer.edu.au
